# Supplementary material for: Surgical peritoneal stress creates a pro-metastatic niche promoting resistance to apoptosis via IL-8
Source: PubMed Central journal article supplement (PMC6171219; doi:10.1186/s12967-018-1643-z), 2018-10-03

Figure S1

**A**

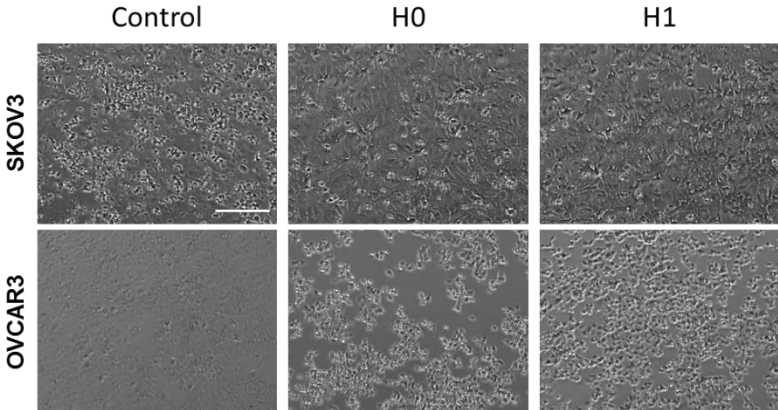

**B**

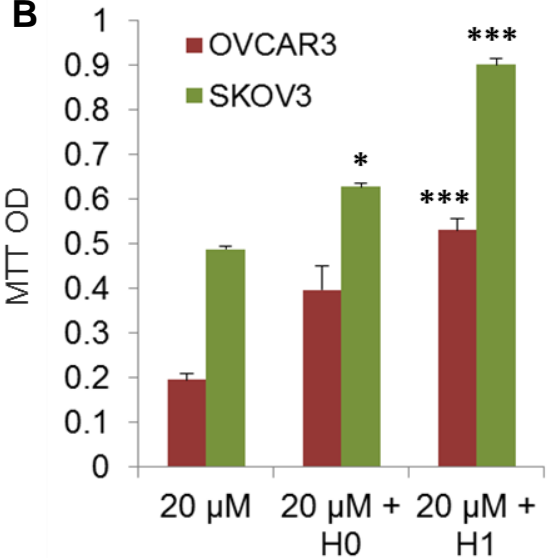

**C**

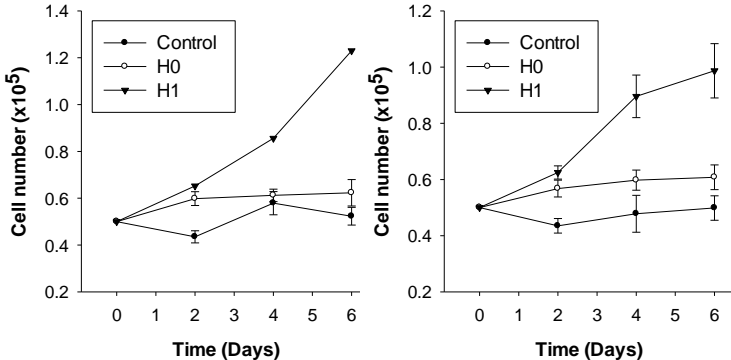

Supplement: 12967_2018_1643_MOESM1_ESM.pdf [file 12967_2018_1643_MOESM1_ESM.pdf]
